# Supplementary material
Source: PubMed Central journal article supplement (PMC30644)
Supplement: pnas_98_6_3276__1.pdf [file pnas_98_6_3276__1.pdf]

**Table 4. *In vitro* proliferative responses to donor class I<sup>c</sup> peptides of splenocytes from immunized recipients of class I disparate hearts**

| Treatment    | Animal | Day Tested | Proliferative responses, SI/cpm |           |           |       |            |          |      |
|--------------|--------|------------|---------------------------------|-----------|-----------|-------|------------|----------|------|
|              |        |            | Peptide 1                       | Peptide 2 | Peptide 3 | Media | GG cells   | HH cells | Self |
| None         | *      |            | 1.7                             | 1.3       | 2.2       |       | 6.3        | 15.9     |      |
| PC14 mixture | 13511  | Postimm.   | 1.3/370                         | 1.2/345   | 216/60530 | 280   | 191/46413  | 1.0/247  | 243  |
|              |        | POD 8      | 62.3/15268                      | 0.8/184   | 223/54574 | 245   | 204/21613  | 3.6/384  | 106  |
| PC14 mixture | 13692  | Postimm.   | 0.8/345                         | 2.0/882   | 167/73689 | 441   | 205/48517  | 56/13272 | 237  |
|              |        | POD 5      | 8.2/5544                        | 0.9/619   | 23/15507  | 676   | 81/9387    | 2.7/310  | 116  |
| PC14 mixture | 14071  | Preimm.    | 0.7/90                          | 1.4/187   | 0.6/80    | 135   | 0.4/74     | 0.2/43   | 211  |
|              |        | Postimm.   | 0.9/477                         | 2.0/1018  | 13.7/6896 | 502   | 48.4/12063 | 1.7/424  | 249  |
|              |        | POD 5      | 0.8/320                         | 1.0/415   | 11.0/4620 | 418   | 49.9/20609 | 6.1/2537 | 413  |
| PC14 mixture | 14311  | Preimm.    | 1.5/142                         | 1.8/167   | 0.8/77    | 93    | 1.1/59     | 0.7/37   | 53   |
|              |        | Postimm.   | 1.0/87                          | 0.9/79    | 26.4/2224 | 84    | 71/6177    | 0.5/40   | 87   |
|              |        | POD 6      | 1.5/92                          | 1.2/70    | 38.5/2308 | 60    | 2.3/155    | 0.6/40   | 67   |

Postimmun., postimmunization; preimm., preimmunization; POD, postoperative day; SI, stimulation index.

\*Represents the average SI of 10 naïve SLAdd pigs + 3 standard errors.
